# Supplementary material for: The Impact of Temperature on the Risk of COVID-19: A Multinational Study
Source: MDPI journal article supplement (doi:10.3390/ijerph18084052), 2021-04-12
Supplement: s1 [file s1]

**Table S1.** Systemic Review of the Association between Ambient Temperature and SARS-CoV-2 Using the Newcastle Ottawa Scale

|                         | Country/area                                          | Climatic data and source                                                                                                                                                                       | Main findings                                                                                                                                                                                                                                                                                                                                                                                                                   | Advantages                                                                                                                           | Limitations                                                                                                 | Newcastle Ottawa Score |
|-------------------------|-------------------------------------------------------|------------------------------------------------------------------------------------------------------------------------------------------------------------------------------------------------|---------------------------------------------------------------------------------------------------------------------------------------------------------------------------------------------------------------------------------------------------------------------------------------------------------------------------------------------------------------------------------------------------------------------------------|--------------------------------------------------------------------------------------------------------------------------------------|-------------------------------------------------------------------------------------------------------------|------------------------|
| Ahmadi et al. [1]       | Iran                                                  | Average temperature, average precipitation, humidity, wind speed, average solar radiation: Weather Spark online web service: <a href="https://weatherspark.com/">https://weatherspark.com/</a> | Population density was the most correlated variable (regression coefficient $r = 0.523$ , $P$ -value = 0.00), followed by movement ( $r = 0.232$ , $P$ -value = 0.003). Average temperature had positive correlation with infection rate ( $r = 0.013$ , $P$ -value = 0.872). The humidity ( $r = -0.160$ , $P$ -value = 0.08) and wind speed ( $r = -0.089$ , $P$ -value = 0.34) had negative correlation with infection rate. | Consider population density and intra-provincial movement                                                                            | The source of the intra-provincial movement, the method to calculate the average climatic data was unclear. | 5                      |
| Bashir et al. [2]       | New York City, US                                     | National weather service, USA                                                                                                                                                                  | Temperature minimum had positive correlation with the number of daily new cases ( $r = 0.248$ , $P$ -value < 0.05); average temperature was associated with mortality ( $r = 0.294$ , $P$ -value < 0.05). Air quality was negatively correlated with daily new cases and mortality.                                                                                                                                             | Considered the air quality                                                                                                           | NA                                                                                                          | 5                      |
| Briz-Redon A et al. [3] | Spain                                                 | Daily mean, minimum and maximum temperatures: OpenData platform of the State Meteorological Agency (AEMET) ( <a href="http://www.aemet.es/en/portada">http://www.aemet.es/en/portada</a> )     | No relationship between the number of SARS-CoV-2 cases and temperature.                                                                                                                                                                                                                                                                                                                                                         | Consider population density, age, number of travelers and number of companies; use of spatio-temporal model to adjust the lag effect | NA                                                                                                          | 7                      |
| Del Rio C et al. [4]    | China, Italy, South Korea, Iran, Philippine, Belgium, | Daily average, maximum, and minimal ambient temperatures: Weather Channel website ( <a href="https://weather.com/">https://weather.com/</a> )                                                  | The regions with ongoing human-to-human transmission showed significantly higher temperatures ( $5.14 \pm 5.94^{\circ}\text{C}$ ) than the regions without ongoing human-to-human                                                                                                                                                                                                                                               | The only study that compared temperature in regions with/without a                                                                   | The way to determine region with human to human transmission was unclear                                    | 4                      |

|                        |                                  |                                                                                                                                                                                                                                                                                                                                                                                                                                                                                                                                                                                                                                                                                                                       |                                                                                                                                                                                                                            |                                                                                                                            |                                                                               |   |
|------------------------|----------------------------------|-----------------------------------------------------------------------------------------------------------------------------------------------------------------------------------------------------------------------------------------------------------------------------------------------------------------------------------------------------------------------------------------------------------------------------------------------------------------------------------------------------------------------------------------------------------------------------------------------------------------------------------------------------------------------------------------------------------------------|----------------------------------------------------------------------------------------------------------------------------------------------------------------------------------------------------------------------------|----------------------------------------------------------------------------------------------------------------------------|-------------------------------------------------------------------------------|---|
|                        | Finland, Egypt, Australia        |                                                                                                                                                                                                                                                                                                                                                                                                                                                                                                                                                                                                                                                                                                                       | transmission ( $17.06 \pm 11.94^{\circ}\text{C}$ ) ( $P$ -value $< 0.05$ ).                                                                                                                                                | human to human transmission.                                                                                               |                                                                               |   |
| Demongeot J et al. [5] | 21 countries                     | 1. Weather Atlas ( <a href="https://www.weather-atlas.com">https://www.weather-atlas.com</a> ) or UNdata ( <a href="http://data.un.org/Data.aspx?d=CLINO&amp;f=ElementCode%3A11">http://data.un.org/Data.aspx?d=CLINO&amp;f=ElementCode%3A11</a> ).<br>2. Mean annual temperatures for that country: Wikipedia ( <a href="https://en.wikipedia.org/wiki/List_of_countries_by_average_yearly_temperature">https://en.wikipedia.org/wiki/List_of_countries_by_average_yearly_temperature</a> ).<br>Minimum, maximum, and average temperature; relative humidity, UV index, precipitation, and cloud cover: World Weather Online ( <a href="https://www.worldweatheronline.com">https://www.worldweatheronline.com</a> ) | High temperatures diminish initial contagion rates, but seasonal temperature effects at later stages of the epidemic remain questionable.                                                                                  | Only study that used the ARIMA regression to approach the new cases' time series in five countries with different weather. | Consider the temperature only                                                 | 4 |
| Gunthe SS et al. [6]   | Global                           | Daily temperature, relative humidity: the National Centers for Environmental Information (NCEI) library ( <a href="https://www.ncdc.noaa.gov/data-access">https://www.ncdc.noaa.gov/data-access</a> )                                                                                                                                                                                                                                                                                                                                                                                                                                                                                                                 | There is a very narrow temperature band of $3\text{--}12^{\circ}\text{C}$ , where 90% of the total confirmed cases are agglomerated.                                                                                       | NA                                                                                                                         | The way to calculate the mean temperature of a country is unclear.            | 5 |
| Gupta S et al. [7]     | US                               | Iran Meteorological Organization (IMO) ( <a href="http://www.irimo.ir/far/index.php">http://www.irimo.ir/far/index.php</a> ).                                                                                                                                                                                                                                                                                                                                                                                                                                                                                                                                                                                         | The majority of the cases were reported in states experiencing temperatures of $4\text{--}11^{\circ}\text{C}$ and absolute humidity of $4\text{--}6\text{ g/m}^3$ .                                                        | Indicated absolute humidity to be a better metric than relative humidity and temperature to study the spread.              | NA                                                                            | 6 |
| Jahangiri M et al. [8] | Iran                             |                                                                                                                                                                                                                                                                                                                                                                                                                                                                                                                                                                                                                                                                                                                       | AUC of the ambient temperature model was 0.5.                                                                                                                                                                              | NA                                                                                                                         | The way to build the model and the dependent variable was unclear.            | 4 |
| Pirouz B, et al. [9]   | China, Japan, South Korea, Italy | Daily wind, humidity, average temperature: unclear source                                                                                                                                                                                                                                                                                                                                                                                                                                                                                                                                                                                                                                                             | Relative humidity with an average of 77.9% affected positively, and maximum daily temperature with an average of $15.4^{\circ}\text{C}$ affected negatively on the confirmed cases. High predictive accuracy of the model. | Provided predictive accuracy using a testing set.                                                                          | It is difficult to independently verify the quality and accuracy of the data. | 4 |
| Pirouz B, et al. [10]  | Italy                            | Average temperature, humidity, wind: unclear source                                                                                                                                                                                                                                                                                                                                                                                                                                                                                                                                                                                                                                                                   | Weather conditions could affect the daily positive cases                                                                                                                                                                   | NA                                                                                                                         | It is difficult to independently verify the quality                           | 4 |

|                        |        |                                                                                                                                                                                 |                                                                                                                                                                                                                    |                                                                                                                                                                                                            |                                                                                                                       |   |
|------------------------|--------|---------------------------------------------------------------------------------------------------------------------------------------------------------------------------------|--------------------------------------------------------------------------------------------------------------------------------------------------------------------------------------------------------------------|------------------------------------------------------------------------------------------------------------------------------------------------------------------------------------------------------------|-----------------------------------------------------------------------------------------------------------------------|---|
| Prata DN, et al. [11]  | Brazil | Annual average temperature: National Institute of Meteorology authority in Brazil                                                                                               | When the temperature was below 25.8°C, each 1°C rise was associated with a -4.8951% decrease in the number of daily cumulative confirmed cases                                                                     | NA                                                                                                                                                                                                         | and accuracy of the data.<br>It is difficult to independently verify the quality and accuracy of the data.            | 3 |
| Sahin M., et al.[12]   | Turkey | Temperature, dew point, humidity, and wind speed: Weather Underground ( <a href="https://www.wunderground.com/">https://www.wunderground.com/</a> )                             | Temperature on the day of cases has the highest correlation with the cases ( $r = -0.483$ ).                                                                                                                       | NA                                                                                                                                                                                                         | The way to calculate the mean temperature is unclear.                                                                 | 3 |
| Shi, P. et al.[13]     | China  | Daily mean temperature: meteorological authority in mainland China ( <a href="http://data.cma.cn">http://data.cma.cn</a> ).                                                     | There was a biphasic relationship of daily confirmed cases rate with temperature (with a peak at about 10 °C).<br>Higher temperatures were associated with a lower relative risk (RR) was 0.96 (95% CI 0.93–0.99). | Consider exposure-lag-response association; conservative explain the results and limitations of the study.                                                                                                 | NA                                                                                                                    | 8 |
| Sobral MFF, et al.[14] | Global | Precipitation, average temperature, maximum temperature, and minimum temperature: the National Oceanic and Atmospheric Administration (NOAA) database                           | Negative association between temperature and the number of cases.                                                                                                                                                  | Demographic density of each country was used as a control variable, with data obtained from the Food and Agriculture Organization and World Bank population estimates for the year 2018 (World Bank 2020). | Collinearity: put highly correlated variables of average, maximum, and minimum temperatures into the regression model | 7 |
| Tobias A, et al.[15]   | Spain  | Daily maximum temperature: the Meteorological Service of Catalunya (MeteoCat) ( <a href="https://en.meteocat.gencat.cat/?lang=en">https://en.meteocat.gencat.cat/?lang=en</a> ) | An average increase of 1°C of maximum temperature decreased the incidence rate by -7.5% (95% CI -12.3– -2.6).                                                                                                      | Adjusted for time-trends and accounted for residual autocorrelation                                                                                                                                        | Small number of days                                                                                                  | 4 |

|                      |           |                                                                                                                                                                                                                                                                                                                                                            |                                                                                                                                                                                                       |                                                                                                           |                                                                                                                                                 |   |
|----------------------|-----------|------------------------------------------------------------------------------------------------------------------------------------------------------------------------------------------------------------------------------------------------------------------------------------------------------------------------------------------------------------|-------------------------------------------------------------------------------------------------------------------------------------------------------------------------------------------------------|-----------------------------------------------------------------------------------------------------------|-------------------------------------------------------------------------------------------------------------------------------------------------|---|
| Tosepu R, et al.[16] | Indonesia | Temperature minimum, temperature maximum, temperature average, humidity, rainfall: Meteorological Department of the Republic of Indonesia                                                                                                                                                                                                                  | Temperature average was correlated with the number of cases ( $r = 0.392$ , $P$ -value $< 0.01$ ).                                                                                                    | NA                                                                                                        | NA                                                                                                                                              | 4 |
| Ujiie M, et al.[17]  | Japan     | Japan Meteorological Agency: ( <a href="https://www.data.jma.go.jp/obd/stats/etrn/index.php">https://www.data.jma.go.jp/obd/stats/etrn/index.php</a> )                                                                                                                                                                                                     | Regression coefficient of temperature was $-0.128$ ( $P$ -value $< 0.01$ ).                                                                                                                           | Adjusted for inbound visitors from China and the ratio of elder people aged $\geq 65$                     | NA                                                                                                                                              |   |
| Yao Y, et al.[18]    | China     | 1. Daily mean temperature, relative humidity: China Meteorological Data Sharing Service System.<br>2. UV radiation: Dutch–Finnish ozone monitoring instrument (OMI) level 2 UV irradiance products, version 003 (OMUVB V003) ( <a href="https://disc.gsfc.nasa.gov/datasets/OMUVB_003/summary">https://disc.gsfc.nasa.gov/datasets/OMUVB_003/summary</a> ) | After adjustment for relative humidity and UV, there was no association of transmission with temperature or UV radiation in Chinese cities.                                                           | The only study that analyzed the association between basic reproduction number ( $R_0$ ) and temperature. | $R_0$ is a dynamic number that will change over time. The study did not explain how did they calculate the $R_0$ in different dates and cities. | 5 |
| Liu J, et al.[19]    | China     | Hourly temperature, relative humidity: Shanghai Meteorological Bureau and Data Center of Ministry of Ecology (absolute humidity was calculated by vapor pressure)                                                                                                                                                                                          | Each $1^\circ\text{C}$ increase in ambient temperature was related to the decline of daily confirmed case counts, and the corresponding pooled RRs were $0.80$ (95% CI $0.75$ – $0.85$ ).             | Considered the population migration and lag effect. Used meta-analysis to pool effect in 30 cities.       | Did not consider the number of population in each city                                                                                          | 7 |
| Qi H, et al.[20]     | China     | Daily average ambient temperature, relative humidity: Weather Underground ( <a href="https://www.wunderground.com/">https://www.wunderground.com/</a> )                                                                                                                                                                                                    | Every $1^\circ\text{C}$ increase in ambient temperature led to a decrease in the daily confirmed cases by 36% to 57% when relative humidity was in 67% to 85.5%.                                      | Showed interaction between average temperature and relative humidity on SARS-CoV-2.                       | Use of the Baidu index as a measure of health-seeking behavior needs to be validated.                                                           | 6 |
| Wu Y, et al.[21]     | Global    | 1. Daily average temperature, average dew point, and average wind speed: National Oceanic and Atmospheric Administration Center ( <a href="https://www.ncei.noaa.gov/access/s">https://www.ncei.noaa.gov/access/s</a>                                                                                                                                      | A $1^\circ\text{C}$ increase in temperature was associated with a 3.08% (95% CI $1.53$ – $4.63$ %) reduction in daily new cases and a 1.19% (95% CI $0.44$ – $1.95$ %) reduction in daily new deaths. | Multi-national comparison                                                                                 | The reason to exclude China in the analysis is unclear.                                                                                         | 7 |

earch/data-search/global-summary-of-the-day).

2. Relative humidity: calculated from the vapor pressure of air at a temperature and saturation water vapor pressure, source unclear.

3. Wind speed: National Oceanic and Atmospheric Administration Center (<https://www.ncei.noaa.gov/access/search/data-search/global-summary-of-the-day>)

---

1. Ahmadi, M.; Sharifi, A.; Dorosti, S.; Jafarzadeh Ghouschi, S.; Ghanbari, N. Investigation of effective climatology parameters on COVID-19 outbreak in Iran. *The Science of the total environment* 2020, 729, 138705, doi:10.1016/j.scitotenv.2020.138705.
2. Bashir, M.F.; Ma, B.; Bilal, Komal, B.; Bashir, M.A.; Tan, D.; Bashir, M. Correlation between climate indicators and COVID-19 pandemic in New York, USA. *Sci Total Environ* 2020, 728, 138835, doi:10.1016/j.scitotenv.2020.138835.
3. Briz-Redon, A.; Serrano-Aroca, A. A spatio-temporal analysis for exploring the effect of temperature on COVID-19 early evolution in Spain. *The Science of the total environment* 2020, 728, 138811, doi:10.1016/j.scitotenv.2020.138811.
4. Del Rio, C.; Camacho-Ortiz, A. Will environmental changes in temperature affect the course of COVID-19? *The Brazilian journal of infectious diseases : an official publication of the Brazilian Society of Infectious Diseases* 2020, 10.1016/j.bjid.2020.04.007, doi:10.1016/j.bjid.2020.04.007.
5. Demongeot, J.; Flet-Berliac, Y.; Seligmann, H. Temperature decreases spread parameters of the new Covid-19 case dynamics. *Biology* 2020, 9, doi:10.3390/biology9050094.
6. Gunthe, S.S.; Swain, B.; Patra, S.S.; Amte, A. On the global trends and spread of the COVID-19 outbreak: preliminary assessment of the potential relation between location-specific temperature and UV index. *Journal of Public Health-Heidelberg* 2020, Published online April 24, doi:10.1007/s10389-020-01279-y.
7. Gupta, S.; Raghuvanshi, G.S.; Chanda, A. Effect of weather on COVID-19 spread in the US: A prediction model for India in 2020. *Sci Total Environ* 2020, 728, 138860, doi:10.1016/j.scitotenv.2020.138860.
8. Jahangiri, M.; Jahangiri, M.; Najafgholipour, M. The sensitivity and specificity analyses of ambient temperature and population size on the transmission rate of the novel coronavirus (COVID-19) in different provinces of Iran. *Sci Total Environ* 2020, 728, 138872, doi:10.1016/j.scitotenv.2020.138872.
9. Pirouz, B.; Haghshenas, S.S.; Haghshenas, S.S.; Piro, P. Investigating a serious challenge in the sustainable development process: analysis of confirmed cases of COVID-19 (new type of coronavirus) through a binary classification using artificial intelligence and regression analysis. *Sustainability* 2020, 12, doi:10.3390/su12062427.
10. Pirouz, B.; Shaffiee Haghshenas, S.; Pirouz, B.; Shaffiee Haghshenas, S.; Piro, P. Development of an assessment method for investigating the impact of climate and urban parameters in confirmed cases of COVID-19: a new challenge in sustainable development. *International journal of environmental research and public health* 2020, 17, doi:10.3390/ijerph17082801.
11. Prata, D.N.; Rodrigues, W.; Bermejo, P.H. Temperature significantly changes COVID-19 transmission in (sub)tropical cities of Brazil. *The Science of the total environment* 2020, 729, 138862, doi:10.1016/j.scitotenv.2020.138862.
12. Sahin, M. Impact of weather on COVID-19 pandemic in Turkey. *Sci Total Environ* 2020, 728, 138810, doi:10.1016/j.scitotenv.2020.138810.
13. Shi, P.; Dong, Y.; Yan, H.; Zhao, C.; Li, X.; Liu, W.; He, M.; Tang, S.; Xi, S. Impact of temperature on the dynamics of the COVID-19 outbreak in China. *Sci Total Environ* 2020, 728, 138890, doi:10.1016/j.scitotenv.2020.138890.
14. Sobral, M.F.F.; Duarte, G.B.; da Penha Sobral, A.I.G.; Marinho, M.L.M.; de Souza Melo, A. Association between climate variables and global transmission of SARS-CoV-2. *The Science of the total environment* 2020, 729, 138997, doi:10.1016/j.scitotenv.2020.138997.
15. Tobias, A.; Molina, T. Is temperature reducing the transmission of COVID-19 ? *Environ Res* 2020, 186, 109553, doi:10.1016/j.envres.2020.109553.
16. Tosepu, R.; Gunawan, J.; Effendy, D.S.; Ahmad, O.A.I.; Lestari, H.; Bahar, H.; Asfian, P. Correlation between weather and Covid-19 pandemic in Jakarta, Indonesia. *Sci Total Environ* 2020, 725, 138436, doi:10.1016/j.scitotenv.2020.138436.
17. Ujiie, M.; Tsuzuki, S.; Ohmagari, N. Effect of temperature on the infectivity of COVID-19. *International journal of infectious diseases : IJID : official publication of the International Society for Infectious Diseases* 2020, 10.1016/j.ijid.2020.04.068, doi:10.1016/j.ijid.2020.04.068.

18. Yao, Y.; Pan, J.; Liu, Z.; Meng, X.; Wang, W.; Kan, H.; Wang, W. No association of COVID-19 transmission with temperature or UV radiation in Chinese cities. *Eur Respir J* 2020, 55, doi:10.1183/13993003.00517-2020.
19. Liu, J.; Zhou, J.; Yao, J.; Zhang, X.; Li, L.; Xu, X.; He, X.; Wang, B.; Fu, S.; Niu, T., et al. Impact of meteorological factors on the COVID-19 transmission: A multi-city study in China. *Sci Total Environ* 2020, 726, 138513, doi:10.1016/j.scitotenv.2020.138513.
20. Qi, H.; Xiao, S.; Shi, R.; Ward, M.P.; Chen, Y.; Tu, W.; Su, Q.; Wang, W.; Wang, X.; Zhang, Z. COVID-19 transmission in Mainland China is associated with temperature and humidity: A time-series analysis. *Sci Total Environ* 2020, 728, 138778, doi:10.1016/j.scitotenv.2020.138778.
21. Wu, Y.; Jing, W.; Liu, J.; Ma, Q.; Yuan, J.; Wang, Y.; Du, M.; Liu, M. Effects of temperature and humidity on the daily new cases and new deaths of COVID-19 in 166 countries. *The Science of the total environment* 2020, 729, 139051, doi:10.1016/j.scitotenv.2020.139051.
